# Supplementary material
Source: ML conference proceedings conference paper supplement (https://proceedings.neurips.cc/paper_files/paper/2023/hash/b29ec434e049fb96f3c4245a405ee976-Abstract.html)
Supplement: Supplementary file 1 [file b29ec434e049fb96f3c4245a405ee976-Supplemental-Conference.pdf]

---

# Brain-like Flexible Visual Inference by Harnessing Feedback-Feedforward Alignment

---

Anonymous Author(s)

Affiliation

Address

email

## Abstract

In natural vision, feedback connections support versatile visual inference capabilities such as making sense of the occluded or noisy bottom-up sensory information or mediating pure top-down processes such as imagination. However, the mechanisms by which the feedback pathway learns to give rise to these capabilities flexibly are not clear. We propose that top-down effects emerge through alignment between feedforward and feedback pathways, each optimizing its own objectives. To achieve this co-optimization, we introduce Feedback-Feedforward Alignment (FFA), a learning algorithm that leverages feedback and feedforward pathways as mutual credit assignment computational graphs, enabling alignment. In our study, we demonstrate the effectiveness of FFA in co-optimizing classification and reconstruction tasks on widely used MNIST and CIFAR10 datasets. Notably, the alignment mechanism in FFA endows feedback connections with emergent visual inference functions, including denoising, resolving occlusions, hallucination, and imagination. Moreover, FFA offers bio-plausibility compared to traditional back-propagation (BP) methods in implementation. By repurposing the computational graph of credit assignment into a goal-driven feedback pathway, FFA alleviates weight transport problems encountered in BP, enhancing the bio-plausibility of the learning algorithm. Our study presents FFA as a promising proof-of-concept for the mechanisms underlying how feedback connections in the visual cortex support flexible visual functions. This work also contributes to the broader field of visual inference underlying perceptual phenomena and has implications for developing more biologically inspired learning algorithms.

## 1 Introduction

Humans possess remarkable abilities to infer the properties of objects even in the presence of occlusion or noise. They can mentally imagine objects and reconstruct their complete forms, even when only partial information is available, regardless of whether they have ever seen the complete form before. The process of visual inference on noisy or uncertain stimuli requires additional time, implying cognitive processes that go beyond a simple feedforward pass on visual input and suggest the involvement of additional mechanisms such as feedback and recurrence (Kar et al., 2019; Kietzmann et al., 2019; Gilbert and Sigman, 2007; Debes and Dragoi, 2023; Kreiman and Serre, 2020). Despite the abundant evidence on the involvement of feedback connections in various cognitive processes, understanding the precise mechanisms through which they flexibly give rise to the ability to infer or generate perceptual experiences is not clear.

While hierarchical feedforward models of the ventral visual cortex based on deep learning of discriminative losses have achieved remarkable success in computer vision tasks (Yamins et al., 2014; Khaligh-Razavi and Kriegeskorte, 2014; Lindsay, 2021), alternative frameworks, such as predictive

processing models, offer a distinct perspective on visual processing. Predictive processing models propose that the brain generates fine-grained predictions about incoming sensory inputs and compares them with actual sensory signals to minimize prediction errors (Rao and Ballard, 1999; Friston, 2009; Clark, 2013). These models emphasize the role of feedback connections in the visual cortex, with higher-level areas sending top-down predictions to lower-level areas to guide perception. Unlike deep learning models that learn from large-scale datasets, predictive processing models prioritize the role of prior knowledge and expectations in shaping perception as originally emphasized as far back as Helmholtz (Helmholtz et al., 1909). By incorporating generative models, these frameworks provide a mechanism for understanding how the brain actively constructs visual representations and resolves ambiguities, including the perception of occluded or uncertain stimuli. While predictive processing models emphasize the active role of top-down predictions and prior knowledge in shaping visual perception, they lag behind feedforward models in mechanistic specificity and thus direct neurophysiological evidence (Walsh et al., 2020; Clark, 2013; Keller and Mrsic-Flogel, 2018).

Another main constraint on the space of models is the learning algorithm to train the model. Classical error backpropagation (BP) has been a workhorse algorithm for training discriminative, feedforward deep neural networks, particularly for visual object recognition (Rumelhart et al., 1986; Krizhevsky et al., 2012). Despite its immense success in training the state-of-the-art, BP has been critiqued on a number of implementational issues, some of which also call into question its bio-plausibility for the brain: weight symmetry requires weight transport to the feedback network (Grossberg, 1987), the feedback network is not used during runtime inference, and feedforward discrimination performance is not robust to noise (Goodfellow et al., 2015; Akrouf, 2019). Beyond these issues, BP is an infinitesimally local estimate of the gradient, and other higher-order methods for computing the gradient could accelerate learning. As pointed out by Bengio (2014), the inverse of the weight matrix, rather than the transpose, may provide a valid path for credit assignment, learning a linear extrapolation of the underlying landscape (Bengio, 2014). However, attempts to match BP by learning the inverse weights instead of the transpose in a stage-wise fashion, also called target propagation (TP), have yielded limited practical success for reasons that are not entirely clear (Lee et al., 2014; Bartunov et al., 2018)—potentially related to the difficulty of learning an inverse function using noisy gradients as opposed to the relative ease of taking a transpose, a noiseless procedure (Kunin et al., 2020).

Here, we simultaneously learn feedforward and feedback functions that are mutual global inverses of each other such that each path can perform credit assignment for the other during the training pass. We term this Feedback-Feedforward Alignment (FFA) since the discriminator (encoder) contributes the gradients for the reconstructor (decoder) and vice versa. We show that rather than trading against each other as in typical, single-objective settings, co-optimizing discrimination and reconstruction objectives can lead to a mutualistic symbiotic interaction.

Next, we explore the potential of the gradient path as a model of feedback connections. Inspired by the structural similarity of the credit assignment computational graph and the feedforward pass which parallels the anatomically reciprocated forward and feedback connections in the visual cortex (Markov et al., 2013, 2014). Importantly we hypothesized an objective function for feedback connections motivated by the *High-resolution buffer hypothesis* by Lee and Mumford (2003) regarding the primary visual cortex (V1), arguing that V1 is uniquely situated to act as a high-resolution buffer to synthesize images through generative processes. We hypothesized that by co-tuning feedforward and feedback connections to optimize two different but dependent objective functions, we could explain the properties of flexible visual inference of visual detail under occlusion, denoising, dreaming, and mental imagery.

The contributions of this study are as follows:

- Based on the role of feedback connections in the brain, we propose a novel strategy to train neural networks to co-optimize for two objective functions.
- We leverage the credit assignment computational graph as feedback connections during learning and inference.
- We suggest and verify that training feedforward and feedback connections for discrimination and reconstruction respectively, induces noise robustness.
- We show that FFA can flexibly support an array of versatile visual inferences such as resolving occlusion, hallucination, and visual imagery.

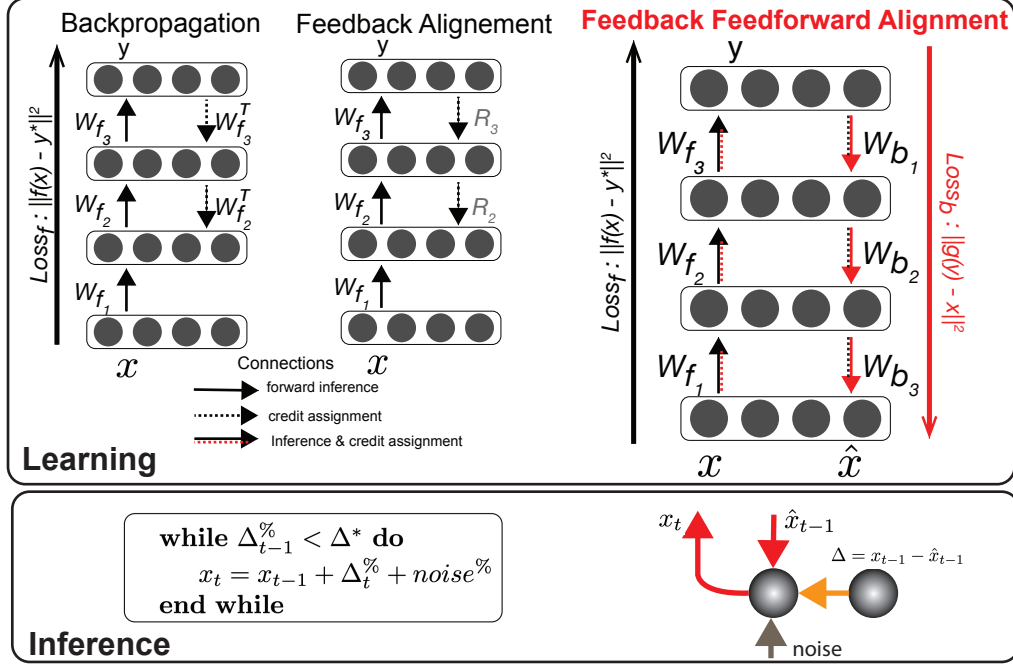

Figure 1: Feedback Feedforward Alignment. Learning: backpropagation and feedback alignment train a discriminator with symmetric  $W_f^T$  or fixed random  $R_i$  weights, respectively. FFA maps input  $x$  to latents  $y$  as in a discriminator but also reconstructs the input  $\hat{x}$  from the latent. The forward and backward pathways also pass gradients back for their counterpart performing inference in the opposite direction. Inference: We run forward and feedback connections trained under FFA in a loop to update the activations ( $x$ ) for each of the inference tasks e.g. mental imagery.  $\Delta$  shows the difference between the input signal and the reconstructed (output). % denotes adjusted value to accommodate convergence. \* shows the desired value. See algorithm 1 in Section 8.4

## 2 Related Work

### 2.1 Models of visual perception and inference in the brain

In going beyond purely feedforward models, there is a large hypothesis space of recurrent neural network models (RNNs), and training inference into an RNN via backpropagation through time raises severe questions about bio-plausibility of the learning algorithm as well as architecture (Lillicrap and Santoro, 2019). Prior work on RNNs for visual classification whether through complex architecture search (Nayebi et al., 2022) or through imposing theoretically motivated lateral recurrent connections (Tang et al., 2014, 2018) has shown benefits for the classification loss but was not geared to improve our understanding of how feedback or recurrence supports inference of visual details. On the other hand, there is increasing evidence supporting distinct phases of processing pertaining to perception and inference which parallels the notion of bottom-up versus top-down processing. Recent studies suggest that feedforward and feedback signaling operate through distinct "channels," enabling feedback signals to influence the forward processing without directly affecting the forward-propagated activity (Semedo et al., 2022; Kreiman and Serre, 2020). Thus, implementing recursion through feedforward and feedback-dominated phases, as we suggest in FFA, has an anatomical and physiological basis.

Internally generated perceptual experiences, such as hallucinations, dreams, and mental imagery evoke vivid experiences that mimic the perception of real-world stimuli. Neuroimaging studies demonstrate an overlap in neural activation between internally generated experiences and perception suggesting a shared neural substrate for generating and processing sensory information (Ganis et al., 2004; Pearson, 2019; Pearson et al., 2008; Abid et al., 2016; Dijkstra et al., 2017). While studies have provided insights into the brain regions involved in these phenomena, the neural mechanisms and computations underlying hallucination and imagery remain a topic of ongoing research and debate. One challenge is

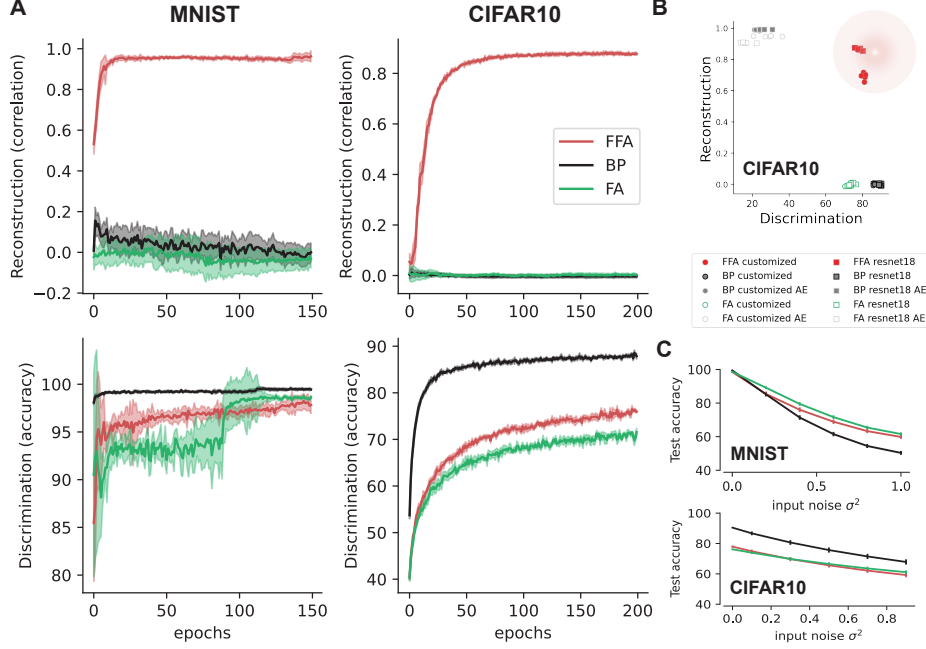

Figure 2: Co-optimization in FFA. A) Accuracy and reconstruction performance for FFA and control algorithms as a function of epochs. B) Dual-task performance for a variety of feedforward discriminative and autoencoder architectures trained under BP or FA compared to FFA training. The shaded area represents the desired corner. C) Robustness to input Gaussian noise as measured by test accuracy on the noisy input.

that hallucinations and imagery are subjective experiences that are difficult to objectively measure and study (Pearson et al., 2008). Additionally, the neural correlates of these experiences can vary across individuals and different types of hallucinations (Suzuki et al., 2017, 2023). Thus, computational modeling of how comparable phenomena can emerge in neural networks, without explicitly training for complex non-bio-plausible generative objective functions, helps elucidate the neural mechanisms that may underpin these internally-generated perceptions.

## 2.2 Bio-plausible training

Our work also falls within the class of bio-plausible extensions of the original BP algorithm that try to avoid the weight transport problem (Grossberg, 1987). One line of work uses a strategy that still aims for BP-like symmetric weights while circumventing weight transport by designing a training objective for the feedback path that encourages symmetry (Akrouit et al., 2019). For example, augmenting a reconstruction loss with weight decay will constrain solutions to the transpose in the linear setting (Kunin et al., 2019, 2020). However, our method differs in two key ways. First, those methods require invoking a separate gradient pass to train the feedback weights whereas we accomplish the training of feedback with the same feedforward network, thus adding no other hidden paths. Second, those methods explicitly seek symmetry whereas we do not constrain the stage-wise feedback weights, only their end-to-end goal. Our algorithm resembles the stage-wise reconstruction in target propagation (TP) which could also result in end-to-end propagation of latent representations back to inputs if noise at each local propagation step is sufficiently small (Bengio, 2014; Lee et al., 2014). Unlike the original TP, we do not constrain the intermediate stages and do not use any BP training on the penultimate layer of the discriminator.

## 3 Feedforward and feedback alignment

During the training, BP uses a computational graph to backpropagate the error to the hidden layers (Figure 1). This computational graph is a linear neural network that is the transpose of the forward

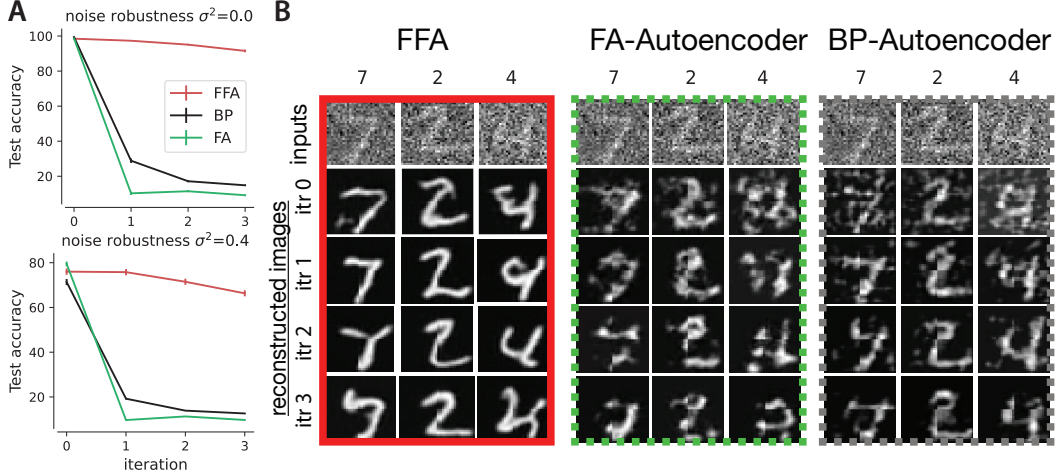

Figure 3: Denoising in FFA. Closed-loop inference on noisy inputs ( $\sigma^2 = 0.4$ ) performed by FFA and control algorithms assuming a static read-out for discrimination set by iteration 0. Shown at right, the sample reconstructions recovered by FFA and control autoencoders over 4 iterations (no clipping or other processing was performed on these images).

neural network and is constantly updated every time the forward weights are updated. FA and in general the family of the random feedback gradient path such as DFA, use random values and do not update the backward weights during the training. FFA in essence runs two FA algorithms to train the forward pass and backward pass alternatively. The FFA diagram in Figure 1 highlights its two distinguishing features: feedback (decoder) has an end-to-end goal and co-opting of the forward discriminator path (encoder) to train this decoder. Below, we compare how FFA operates on MNIST across two architectures (fully connected and convolutional) and on CIFAR10 using a ResNet architecture by directly reconstructing from the ten-dimensional discriminator output. For details on the architecture please refer to Supplementary material 8.1. For each architecture, we compare FFA to BP and feedback alignment (FA) (Lillicrap et al., 2016) training of a single objective (feedforward discrimination or an autoencoder loss) resulting in 5 control models: FFA, BP, FA, BP-AE, and FA-AE. The purpose of these controls was to verify that the properties of gradient descent on a single loss does not trivially invoke reconstruction of input for example in BP-trained networks.

### 3.1 FFA achieves the co-optimization of discrimination and reconstruction

We highlight performance results on a convolutional architecture but also report results on a fully connected architecture. Convolutional architectures are potentially of greater interest because they are used for scaling up algorithms to larger datasets. Furthermore, convolutional architectures tend to expose greater performance gaps between BP and FA (Bartunov et al., 2018). FFA-trained networks achieved digit discrimination performance on par with FA but slightly below BP (Figure 2). However, on MNIST, discrimination performance is exceedingly high. Critically, we were also interested in seeing if FFA could co-train, using only the discriminator weights for credit assignment, a digit reconstruction path. We found that FFA produced reconstruction on par with a BP-trained autoencoder for convolutional architectures while slightly lagging the autoencoder standard for reconstruction on fully connected architectures. Thus, within the same network, FFA co-optimizes two objectives at levels approaching the high individual standards set by a BP-trained discriminator and a BP-trained reconstructor (see Figure 2 and Supp. Figure 7). In FFA, like FA, the feedforward and feedback weights aligned over training (Lillicrap et al., 2016), but only in FFA, alignment is useful for reconstruction, presumably because both paths are free to align to each other which breaks the random feedback constraint of FA. In examining discrimination versus reconstruction performance, these can be mutually exclusive. For example, single objective networks tend to improve along one axis or the other. In contrast, FFA-trained networks moved toward the top-right corner of the plot indicating co-optimization along both axes (Figure 2, scatter plot). As shown in Figure 2 B for CIFAR10, FFA and FA both struggle to keep up with BP, so for the rest of the paper regarding inference, we focus on MNIST.

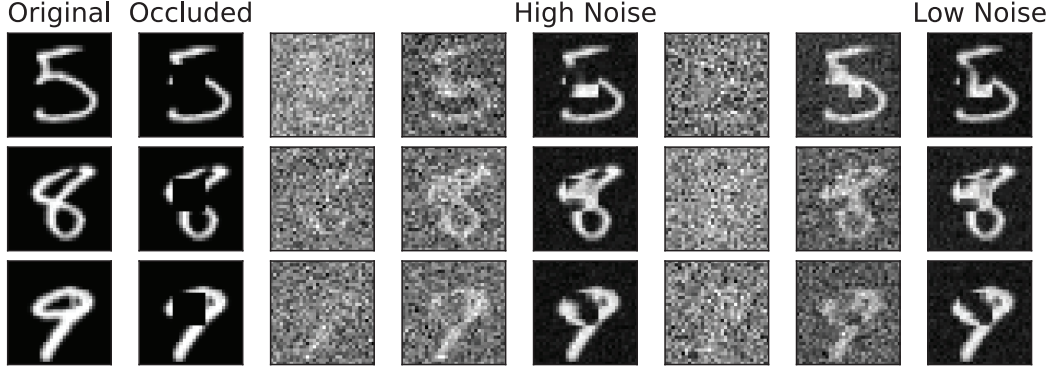

Figure 4: Resolving occlusion. A 15x15 black square occludes the digits in the first columns as shown in the second column. For high noise and low noise visual inference, the resolved digit is depicted in 5th and the last columns, respectively.

### 171 3.2 FFA induces robustness to image noise and adversarial attacks

172 Although in FFA training, we did not use any noise augmentation, as we show in this section, the  
 173 network trained under FFA developed robustness to noise and adversarial attacks relative to the  
 174 BP control. Previous works showed that BP networks are vulnerable to noise and highlighted that  
 175 FA-trained networks are surprisingly robust (Goodfellow et al., 2015; Akrou, 2019). When pixel  
 176 noise was used to degrade input characters, we found that FFA was more robust than BP conferring  
 177 some of the same robustness seen in FA (Figure 2 C). This advantage of FFA and FA over BP was  
 178 also true for gradient-based white-box adversarial attacks (Figure Suppl. 8).

## 179 4 Flexible visual inference through recursion

180 While FFA is not explicitly a recurrent network, by coupling the feedforward and feedback pathways  
 181 through mutual learning of dual, complementary losses, it may indirectly encourage compatibility  
 182 in their inference processes. That is, we can run the network in a closed loop, passing  $z$  from the  
 183 decoder back in as input to the encoder (replacing  $x$ ) (see Figure 1). In this section, we explore  
 184 the capabilities of FFA in dealing with missing information (noise or occlusion) and in generation  
 185 (visual imagery, hallucinations, or dreams). It is worth noting that FFA was not trained to perform  
 186 any of these tasks and was only trained for discrimination and reconstruction, conditioned on this  
 187 discrimination.

188 The inference algorithm we use in this section relies on two main components: recursion, and noisiness  
 189 of inference in each recursion. The algorithm was developed in Kadkhodaie and Simoncelli (2021)  
 190 for denoiser autoencoders based on *Empirical Bayes Theorem* (Miyasawa, 1961). Although FFA is  
 191 not trained as a denoiser autoencoder (no noisy input was used during training), we hypothesized that  
 192 since it exhibits robustness to noise properties, then the theory applies here and the algorithm can be  
 193 adapted to draw effective inferences from the representation learned by FFA. We especially focused  
 194 on the effect of the noisiness of inference to inform the computational role of noise in neuronal  
 195 activation as this remains largely unknown despite extensive active research (Echeveste and Lengyel,  
 196 2018; Findling and Wyart, 2021; McDonnell and Ward, 2011).

### 197 4.1 Denoising

198 As a first step toward future recurrent processing within FFA, we simply ran the network in a closed  
 199 loop, passing  $\hat{x}$  from the decoder back in as input to the encoder (replacing  $x$ ) (see Figure 1) and  
 200 found that both discrimination and reconstruction performance is sustained over iterations similar to  
 201 an autoencoder whereas BP and FA discriminators change over multiple closed-loop iterations and  
 202 thus would require a dynamic decoder to recover any performance (Figure 3).

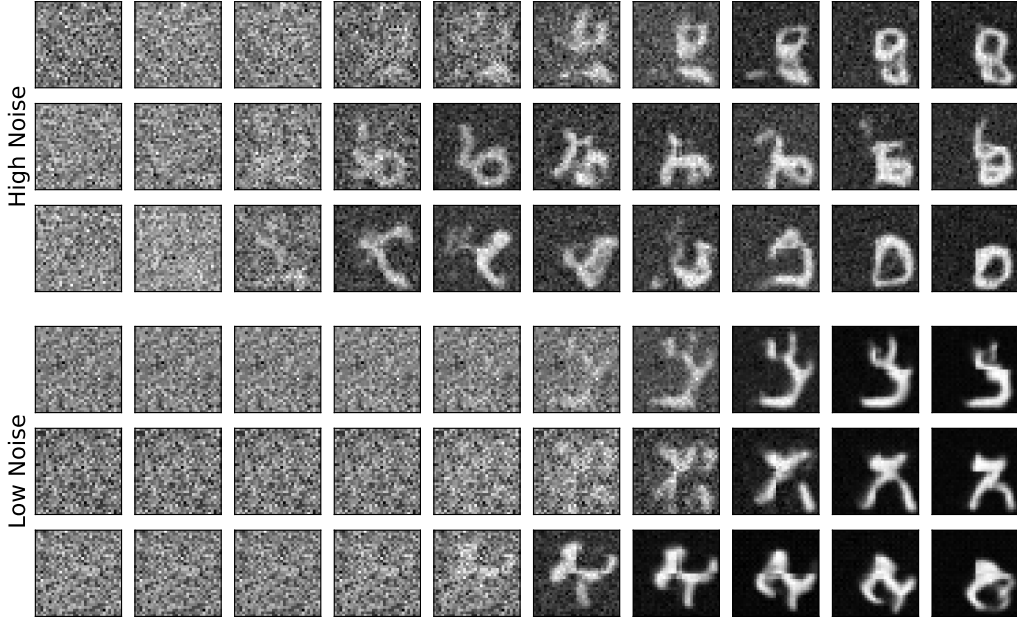

Figure 5: Hallucination. Without external input, we let the inference algorithm run on the FFA-trained network until convergence (the last column) for high noise (upper) and low noise (lower) inference. The sample iterations are linearly spaced and for high noise, there are typically twice as many iterations needed. Refer to Section 8.6 for iteration values.

## 4.2 Resolving occlusions

We occlude parts of an input image by a blank square and run the network inference. The assumption here is that the occluded image was briefly presented and during the inference, the original image is not accessible throughout inference. Figure 4 shows examples of completion of the pattern using FFA. Even though for high noise inference more iterations were needed, the generated samples do not reflect any superiority compared to low noise inference which took fewer iterations to converge.

## 4.3 Hallucination

Visual hallucinations refer to the experience of perceiving objects or events even when there is no corresponding sensory stimulation that would typically give rise to such perceptions. As mentioned above, the spontaneous activity in V1 is linked to the vividness of hallucinated patterns. Here, we let the FFA-trained network run through the inference algorithm starting from Gaussian noise and adding noise in each iteration. As shown in Figure 5, when in the high noise regime ( $\beta = 0.2$ ), the quality of hallucinated digits is better compared to the low noise regime ( $\beta = 0.99$ , for the definition of  $\beta$  see Section 8.4). Given that the noise in the inference algorithm controls the convergence rate (Kadkhodaie and Simoncelli, 2021), these results suggest that the computational role of spontaneous activity in generating stronger hallucinated percepts may be the refinement of the hallucinated patterns.

## 4.4 Mental imagery

Visual mental imagery refers to the ability to create mental representations or pictures of visual information in the absence of actual sensory input (Pearson et al., 2015; Colombo, 2012). A key distinction between mental imagery and hallucinations is that mental imagery involves *voluntarily* creating mental images through imagination, while hallucinations are involuntary sensory perceptions. To implement the voluntary, top-down activation of a percept (e.g. '9'), we add the average activation pattern of the category in the latent layer to each recursion in the inference algorithm. Presumably, the brain has a recollection of the category which can be read out from memory during mental imagery. Figure 6 shows that as noise in the inference goes higher, so does the quality of the imagined digits.

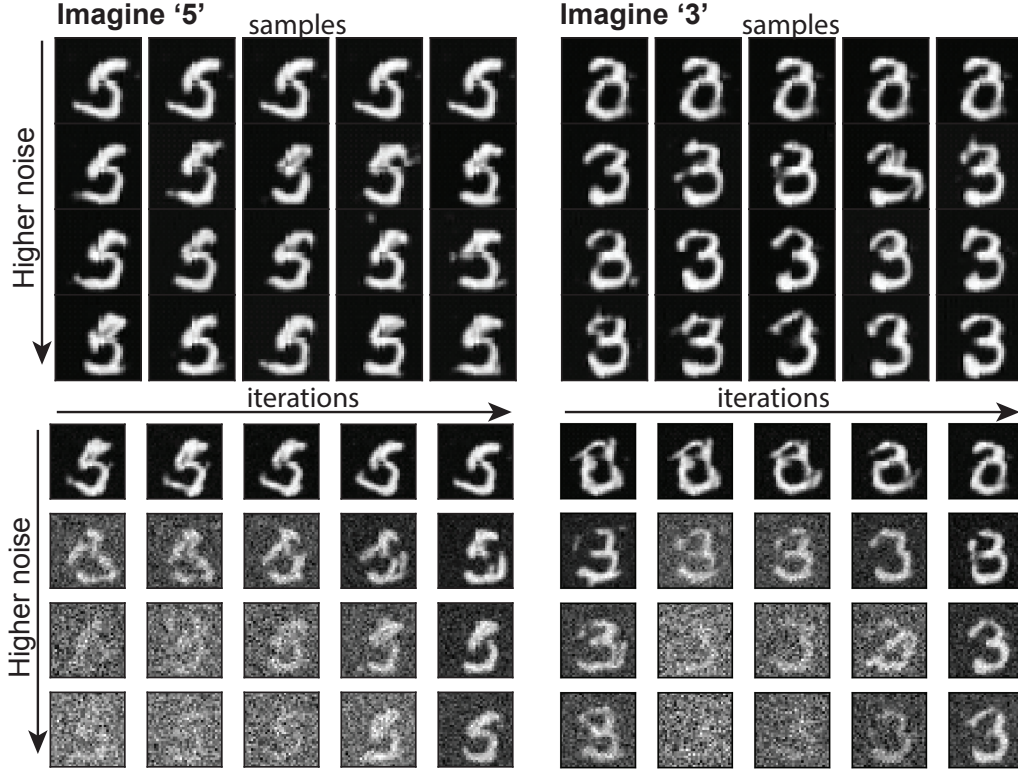

Figure 6: Visual imagery. Generated samples (upper panels) using the inference algorithm on the FFA-trained network when top-down signal '5' (left) and '3' (right) was activated. The sample iterations (equally spaced) for sample generations were shown in the lower panel. Each row corresponds to an inference noise level. Refer to Section 8.5 for iteration and  $\beta$  values

## 229 5 Limitations

230 We acknowledge several limitations of the Feedback-Feedforward Alignment (FFA) framework in its  
 231 current form. One key limitation is the difficulty of scaling FFA to larger datasets, such as ImageNet.  
 232 While we observed gaps in performance compared to classical backpropagation (BP) on CIFAR10,  
 233 we found little difference compared to the Feedback Alignment (FA) baseline in discrimination  
 234 performance. However, it is possible that FFA could be more suitable for specific architectures,  
 235 such as transformers, where layer sizes do not decrease towards the output layer. Scaling up FFA  
 236 requires further theoretical and empirical exploration. Another limitation is related to the assessment  
 237 of the generated inferences. Currently, the evaluation relies primarily on visual inspection. Although  
 238 we included classifier accuracy reports for denoising, it assumes that perception arises solely from  
 239 top activations and that bottom hierarchy activation (such as V1) does not directly contribute to  
 240 perception. Enhancing the evaluation methodology to incorporate more objective measures and  
 241 quantitative assessments of generated inferences would strengthen the framework. Furthermore,  
 242 while FFA demonstrates a balance between discrimination performance, efficient learning, and robust  
 243 recurrent inference, it is important to acknowledge that FFA may not fully capture all aspects of the  
 244 biological brain. The framework represents a step towards understanding the brain's mechanisms  
 245 but may still fall short in faithfully replicating the intricacies of neural processing. Overall, these  
 246 limitations highlight the need for further research and development to address the scalability of  
 247 FFA, refine evaluation methodologies, and gain deeper insights into the biological plausibility of the  
 248 framework. Overcoming these limitations will pave the way for more effective and robust alternatives  
 249 to BP, advancing the understanding and application of neural network training algorithms.

## 6 Conclusions

In moving beyond classical error backpropagation training of a single-objective, feedforward network, we have presented a feedforward-feedback algorithm that trains neural networks to achieve mutualistic optimization of dual objectives. Co-optimization provides attendant advantages: avoids weight transport, increases robustness to noise and adversarial attack, and gives feedback its own runtime function that allows closed-loop inference. Through our experiments, we demonstrated that the network trained using the FFA approach supports various visual inference tasks.

## 7 Broader Impacts

This work has broader impacts that include advancing our understanding of human perception, enhancing the robustness and performance of neural networks, helping to identify the emergence of closed-loop inference in larger networks for real-time applications, and potential implications for clinical research of mental disorders. By studying the neural mechanisms underlying visual perception, this research contributes to our understanding of natural and artificial vision.

## References

- Abid, H., Ahmad, F., Lee, S. Y., Park, H. W., Im, D., Ahmad, I., and Chaudhary, S. U. (2016). A functional magnetic resonance imaging investigation of visual hallucinations in the human striate cortex. *Behav. Brain Funct.*, 12(1):31.
- Akrout, M. (2019). On the Adversarial Robustness of Neural Networks without Weight Transport. *arXiv:1908.03560 [cs, stat]*. arXiv: 1908.03560.
- Akrout, M., Wilson, C., Humphreys, P. C., Lillicrap, T., and Tweed, D. (2019). Deep Learning without Weight Transport. *arXiv:1904.05391 [cs, stat]*. arXiv: 1904.05391.
- Bartunov, S., Santoro, A., Richards, B. A., Marris, L., Hinton, G. E., and Lillicrap, T. (2018). Assessing the Scalability of Biologically-Motivated Deep Learning Algorithms and Architectures. *arXiv:1807.04587 [cs, stat]*. arXiv: 1807.04587.
- Bengio, Y. (2014). How Auto-Encoders Could Provide Credit Assignment in Deep Networks via Target Propagation. *arXiv:1407.7906 [cs]*. arXiv: 1407.7906.
- Clark, A. (2013). Whatever next? predictive brains, situated agents, and the future of cognitive science. *Behav. Brain Sci.*, 36(3):181–204.
- Colombo, B. (2012). Mental imagery. In *Encyclopedia of the Sciences of Learning*, pages 2187–2191. Springer US, Boston, MA.
- Debes, S. R. and Dragoi, V. (2023). Suppressing feedback signals to visual cortex abolishes attentional modulation. *Science*, 379(6631):468–473.
- Dijkstra, N., Bosch, S. E., and van Gerven, M. A. J. (2017). Vividness of visual imagery depends on the neural overlap with perception in visual areas. *J. Neurosci.*, 37(5):1367–1373.
- Echeveste, R. and Lengyel, M. (2018). The redemption of noise: Inference with neural populations. *Trends Neurosci.*, 41(11):767–770.
- Findling, C. and Wyart, V. (2021). Computation noise in human learning and decision-making: origin, impact, function. *Curr. Opin. Behav. Sci.*, 38:124–132.
- Friston, K. (2009). The free-energy principle: a rough guide to the brain? *Trends Cogn. Sci.*, 13(7):293–301.
- Ganis, G., Thompson, W. L., and Kosslyn, S. M. (2004). Brain areas underlying visual mental imagery and visual perception: an fMRI study. *Cognitive Brain Research*, 20(2):226–241.
- Gilbert, C. D. and Sigman, M. (2007). Brain states: top-down influences in sensory processing. *Neuron*, 54(5):677–696.

294 Goodfellow, I. J., Shlens, J., and Szegedy, C. (2015). Explaining and Harnessing Adversarial  
295 Examples. *arXiv:1412.6572 [cs, stat]*. arXiv: 1412.6572.

296 Grossberg, S. (1987). Competitive learning: From interactive activation to adaptive resonance.  
297 *Cognitive Science*, 11(1):23–63.

298 He, K., Zhang, X., Ren, S., and Sun, J. (2015). Deep Residual Learning for Image Recognition.  
299 *arXiv:1512.03385 [cs]*. arXiv: 1512.03385.

300 Helmholtz, H. v., Gullstrand, A., Kries, J. v., Nagel, W. A., and University College, L. L. S. (1909).  
301 *Handbuch der Physiologischen Optik [electronic resource]*. Hamburg ; Leipzig : verlag von  
302 Leopold Voss.

303 Kadhodaie, Z. and Simoncelli, E. (2021). Stochastic solutions for linear inverse problems using  
304 the prior implicit in a denoiser. In Ranzato, M., Beygelzimer, A., Dauphin, Y., Liang, P., and  
305 Vaughan, J. W., editors, *Advances in Neural Information Processing Systems*, volume 34, pages  
306 13242–13254. Curran Associates, Inc.

307 Kar, K., Kubilius, J., Schmidt, K., Issa, E. B., and DiCarlo, J. J. (2019). Evidence that recurrent  
308 circuits are critical to the ventral stream’s execution of core object recognition behavior. *Nat.*  
309 *Neurosci.*, 22(6):974–983.

310 Keller, G. B. and Mrsic-Flogel, T. D. (2018). Predictive Processing: A Canonical Cortical Computa-  
311 tion. *Neuron*, 100(2):424–435.

312 Khaligh-Razavi, S.-M. and Kriegeskorte, N. (2014). Deep supervised, but not unsupervised, models  
313 may explain IT cortical representation. *PLoS Comput. Biol.*, 10(11):e1003915.

314 Kietzmann, T. C., Spoerer, C. J., Sörensen, L. K. A., Cichy, R. M., Hauk, O., and Kriegeskorte,  
315 N. (2019). Recurrence is required to capture the representational dynamics of the human visual  
316 system. *Proc. Natl. Acad. Sci. U. S. A.*, 116(43):21854–21863.

317 Kreiman, G. and Serre, T. (2020). Beyond the feedforward sweep: feedback computations in the  
318 visual cortex. *Ann. N. Y. Acad. Sci.*, 1464(1):222–241.

319 Krizhevsky, A., Sutskever, I., and Hinton, G. E. (2012). ImageNet Classification with Deep Convolu-  
320 tional Neural Networks. In Pereira, F., Burges, C. J. C., Bottou, L., and Weinberger, K. Q., editors,  
321 *Advances in Neural Information Processing Systems 25*, pages 1097–1105. Curran Associates, Inc.

322 Kunin, D., Bloom, J. M., Goeva, A., and Seed, C. (2019). Loss Landscapes of Regularized Linear  
323 Autoencoders. *arXiv:1901.08168 [cs, stat]*. arXiv: 1901.08168.

324 Kunin, D., Nayeibi, A., Sagastuy-Brena, J., Ganguli, S., Bloom, J., and Yamins, D. L. K. (2020). Two  
325 Routes to Scalable Credit Assignment without Weight Symmetry. *arXiv:2003.01513 [cs, q-bio,*  
326 *stat]*. arXiv: 2003.01513.

327 Lee, D.-H., Zhang, S., Fischer, A., and Bengio, Y. (2014). Difference Target Propagation.  
328 *arXiv:1412.7525 [cs]*. arXiv: 1412.7525.

329 Lee, T. S. and Mumford, D. (2003). Hierarchical bayesian inference in the visual cortex. *JOSA A*,  
330 20(7):1434–1448.

331 Lillicrap, T. P., Cownden, D., Tweed, D. B., and Akerman, C. J. (2016). Random synaptic feedback  
332 weights support error backpropagation for deep learning. *Nature Communications*, 7:13276.

333 Lillicrap, T. P. and Santoro, A. (2019). Backpropagation through time and the brain. *Current Opinion*  
334 *in Neurobiology*, 55:82–89.

335 Lindsay, G. W. (2021). Convolutional neural networks as a model of the visual system: Past, present,  
336 and future. *J. Cogn. Neurosci.*, 33(10):2017–2031.

337 Markov, N. T., Ercsey-Ravasz, M., Essen, D. C. V., Knoblauch, K., Toroczkai, Z., and Kennedy, H.  
338 (2013). Cortical High-Density Counterstream Architectures. *Science*, 342(6158):1238406.

339 Markov, N. T., Vezoli, J., Chameau, P., Arnaud Falchier, Quilodran, R., Huissoud, C., Lamy, C.,  
340 Misery, P., Giroud, P., Ullman, S., Barone, P., Dehay, C., Knoblauch, K., and Kennedy, H. (2014).  
341 Anatomy of a hierarchy: Feedforward and feedback pathways in macaque visual cortex. *Journal*  
342 *of Comparative Neurology*, 522(1):225–259.

343 McDonnell, M. D. and Ward, L. M. (2011). The benefits of noise in neural systems: bridging theory  
344 and experiment. *Nat. Rev. Neurosci.*, 12(7):415–426.

345 Miyasawa, K. (1961). On the convergence of the learning process in a 2 x 2 non-zero-sum two-person  
346 game.

347 Nayebi, A., Sagastuy-Brena, J., Bear, D. M., Kar, K., Kubilius, J., Ganguli, S., Sussillo, D., DiCarlo,  
348 J. J., and Yamins, D. L. K. (2022). Recurrent connections in the primate ventral visual stream  
349 mediate a trade-off between task performance and network size during core object recognition.  
350 *Neural Comput.*, 34(8):1652–1675.

351 Pearson, J. (2019). The human imagination: the cognitive neuroscience of visual mental imagery.  
352 *Nat. Rev. Neurosci.*, 20(10):624–634.

353 Pearson, J., Clifford, C. W. G., and Tong, F. (2008). The functional impact of mental imagery on  
354 conscious perception. *Curr. Biol.*, 18(13):982–986.

355 Pearson, J., Naselaris, T., Holmes, E. A., and Kosslyn, S. M. (2015). Mental imagery: Functional  
356 mechanisms and clinical applications. *Trends Cogn. Sci.*, 19(10):590–602.

357 Rao, R. P. N. and Ballard, D. H. (1999). Predictive coding in the visual cortex: a functional  
358 interpretation of some extra-classical receptive-field effects. *Nature Neuroscience*, 2(1):79–87.

359 Rumelhart, D. E., Hinton, G. E., and Williams, R. J. (1986). Learning representations by back-  
360 propagating errors. *Nature*, 323(6088):533–536.

361 Semedo, J. D., Jasper, A. I., Zandvakili, A., Krishna, A., Aschner, A., Machens, C. K., Kohn, A.,  
362 and Yu, B. M. (2022). Feedforward and feedback interactions between visual cortical areas use  
363 different population activity patterns. *Nat. Commun.*, 13(1):1099.

364 Suzuki, K., Roseboom, W., Schwartzman, D. J., and Seth, A. K. (2017). A deep-dream virtual reality  
365 platform for studying altered perceptual phenomenology. *Sci. Rep.*, 7(1):15982.

366 Suzuki, K., Seth, A. K., and Schwartzman, D. J. (2023). Modelling phenomenological differences in  
367 aetiologically distinct visual hallucinations using deep neural networks.

368 Tang, H., Buia, C., Madhavan, R., Crone, N. E., Madsen, J. R., Anderson, W. S., and Kreiman, G.  
369 (2014). Spatiotemporal dynamics underlying object completion in human ventral visual cortex.  
370 *Neuron*, 83(3):736–748.

371 Tang, H., Schrimpf, M., Lotter, W., Moerman, C., Paredes, A., Ortega Caro, J., Hardesty, W., Cox,  
372 D., and Kreiman, G. (2018). Recurrent computations for visual pattern completion. *Proc. Natl.*  
373 *Acad. Sci. U. S. A.*, 115(35):8835–8840.

374 Walsh, K. S., McGovern, D. P., Clark, A., and O’Connell, R. G. (2020). Evaluating the neuro-  
375 physiological evidence for predictive processing as a model of perception. *Ann. N. Y. Acad. Sci.*,  
376 1464(1):242–268.

377 Yamins, D. L. K., Hong, H., Cadieu, C. F., Solomon, E. A., Seibert, D., and DiCarlo, J. J. (2014).  
378 Performance-optimized hierarchical models predict neural responses in higher visual cortex. *Proc.*  
379 *Natl. Acad. Sci. U. S. A.*, 111(23):8619–8624.

## 8 Supplementary

### 8.1 Model architectures

For the experiment on a fully connected architecture, we used a 4-layer network with [1024, 256, 256, 10] neurons in each layer and ReLU non-linearity between layers. For the experiment on a convolutional architecture, we used a modified version of resnet (He et al., 2015), where the last convolutional layer has the same number of channels as classes, and an adaptive average pooling operator is used to read out of each channel (see below). Since the last layer doesn't have any learnable parameters, the penultimate layer can be as large as desired which works fine for FFA. The convolutional architecture consists of 11 convolutional layers with 658,900 trainable parameters in total.

For autoencoder controls (trained under BP or FA), we additionally trained a linear decoder on the activations of the penultimate layer to assess the linear separability of the representation learned by autoencoders.

```
modelF: DataParallel(  
  (module): AsymResLNet10F(  
    (conv1): AsymmetricFeedbackConv2d(1, 64, kernel_size=(7, 7),  
      stride=(2, 2), padding=(3, 3), bias=False)  
    (bn1): BatchNorm2d(64, eps=1e-05, momentum=0.1,  
      affine=True, track_running_stats=False)  
    (relu): ReLU(inplace=True)  
    (conv11): AsymmetricFeedbackConv2d(64, 64, kernel_size=(3, 3),  
      stride=(1, 1), padding=(1, 1), bias=False)  
    (bn11): BatchNorm2d(64, eps=1e-05, momentum=0.1,  
      affine=True, track_running_stats=False)  
    (conv12): AsymmetricFeedbackConv2d(64, 64, kernel_size=(3, 3),  
      stride=(1, 1), padding=(1, 1), bias=False)  
    (bn12): BatchNorm2d(64, eps=1e-05, momentum=0.1,  
      affine=True, track_running_stats=False)  
    (conv21): AsymmetricFeedbackConv2d(64, 64, kernel_size=(3, 3),  
      stride=(1, 1), padding=(1, 1), bias=False)  
    (bn21): BatchNorm2d(64, eps=1e-05, momentum=0.1,  
      affine=True, track_running_stats=False)  
    (conv22): AsymmetricFeedbackConv2d(64, 128,  
      kernel_size=(3, 3),  
      stride=(1, 1), padding=(1, 1), bias=False)  
    (bn22): BatchNorm2d(128, eps=1e-05, momentum=0.1,  
      affine=True, track_running_stats=False)  
    (downsample1): AsymmetricFeedbackConv2d(64, 128,  
      kernel_size=(1, 1), stride=(1, 1), bias=False)  
    (bn23): BatchNorm2d(128, eps=1e-05, momentum=0.1,  
      affine=True, track_running_stats=False)  
    (conv31): AsymmetricFeedbackConv2d(128, 128,  
      kernel_size=(3, 3),  
      stride=(2, 2), padding=(1, 1), bias=False)  
    (bn31): BatchNorm2d(128, eps=1e-05, momentum=0.1,  
      affine=True, track_running_stats=False)  
    (conv32): AsymmetricFeedbackConv2d(128, 128,  
      kernel_size=(3, 3),  
      stride=(1, 1), padding=(1, 1), bias=False)  
    (bn32): BatchNorm2d(128, eps=1e-05, momentum=0.1,  
      affine=True, track_running_stats=False)  
    (conv41): AsymmetricFeedbackConv2d(128, 128,  
      kernel_size=(3, 3),  
      stride=(1, 1), padding=(1, 1), bias=False)  
    (bn41): BatchNorm2d(128, eps=1e-05, momentum=0.1,  
      affine=True, track_running_stats=False)
```

```

436     (conv42): AsymmetricFeedbackConv2d(128, 10,
437     kernel_size=(3, 3),
438     stride=(1, 1), padding=(1, 1), bias=False)
439     (bn42): BatchNorm2d(10, eps=1e-05, momentum=0.1,
440     affine=True, track_running_stats=False)
441     (downsample2): AsymmetricFeedbackConv2d(128, 10,
442     kernel_size=(1, 1), stride=(2, 2), bias=False)
443     (avgpool): AdaptiveAvgPool2d(output_size=(1, 1)))
444 )
445
446 modelB: DataParallel(
447     (module): AsymResLNet10B(
448         (upsample2): AsymmetricFeedbackConvTranspose2d(10, 128,
449         kernel_size=(1, 1), stride=(2, 2), output_padding=(1, 1),
450         bias=False)
451         (bn42): BatchNorm2d(10, eps=1e-05, momentum=0.1,
452         affine=True, track_running_stats=False)
453         (conv42): AsymmetricFeedbackConvTranspose2d(10, 128,
454         kernel_size=(3, 3), stride=(1, 1), padding=(1, 1), bias=False)
455         (relu): ReLU(inplace=True)
456         (bn41): BatchNorm2d(128, eps=1e-05, momentum=0.1,
457         affine=True, track_running_stats=False)
458         (conv41): AsymmetricFeedbackConvTranspose2d(128, 128,
459         kernel_size=(3, 3), stride=(1, 1), padding=(1, 1), bias=False)
460         (bn32): BatchNorm2d(128, eps=1e-05, momentum=0.1,
461         affine=True, track_running_stats=False)
462         (conv32): AsymmetricFeedbackConvTranspose2d(128, 128,
463         kernel_size=(3, 3), stride=(1, 1), padding=(1, 1), bias=False)
464         (bn31): BatchNorm2d(128, eps=1e-05, momentum=0.1,
465         affine=True, track_running_stats=False)
466         (conv31): AsymmetricFeedbackConvTranspose2d(128, 128,
467         kernel_size=(3, 3), stride=(2, 2), padding=(1, 1),
468         output_padding=(1, 1), bias=False)
469         (bn23): BatchNorm2d(128, eps=1e-05, momentum=0.1,
470         affine=True, track_running_stats=False)
471         (upsample1): AsymmetricFeedbackConvTranspose2d(128, 64,
472         kernel_size=(1, 1), stride=(1, 1), bias=False)
473         (bn22): BatchNorm2d(128, eps=1e-05, momentum=0.1,
474         affine=True, track_running_stats=False)
475         (conv22): AsymmetricFeedbackConvTranspose2d(128, 64,
476         kernel_size=(3, 3), stride=(1, 1), padding=(1, 1), bias=False)
477         (bn21): BatchNorm2d(64, eps=1e-05, momentum=0.1,
478         affine=True, track_running_stats=False)
479         (conv21): AsymmetricFeedbackConvTranspose2d(64, 64,
480         kernel_size=(3, 3), stride=(1, 1), padding=(1, 1), bias=False)
481         (bn12): BatchNorm2d(64, eps=1e-05, momentum=0.1,
482         affine=True, track_running_stats=False)
483         (conv12): AsymmetricFeedbackConvTranspose2d(64, 64,
484         kernel_size=(3, 3), stride=(1, 1), padding=(1, 1), bias=False)
485         (bn11): BatchNorm2d(64, eps=1e-05, momentum=0.1,
486         affine=True, track_running_stats=False)
487         (conv11): AsymmetricFeedbackConvTranspose2d(64, 64,
488         kernel_size=(3, 3), stride=(1, 1), padding=(1, 1), bias=False)
489         (bn1): BatchNorm2d(64, eps=1e-05, momentum=0.1,
490         affine=True, track_running_stats=False)
491         (conv1): AsymmetricFeedbackConvTranspose2d(64, 1,
492         kernel_size=(7, 7), stride=(2, 2), padding=(2, 2),
493         output_padding=(1, 1), bias=False))
494     )

```

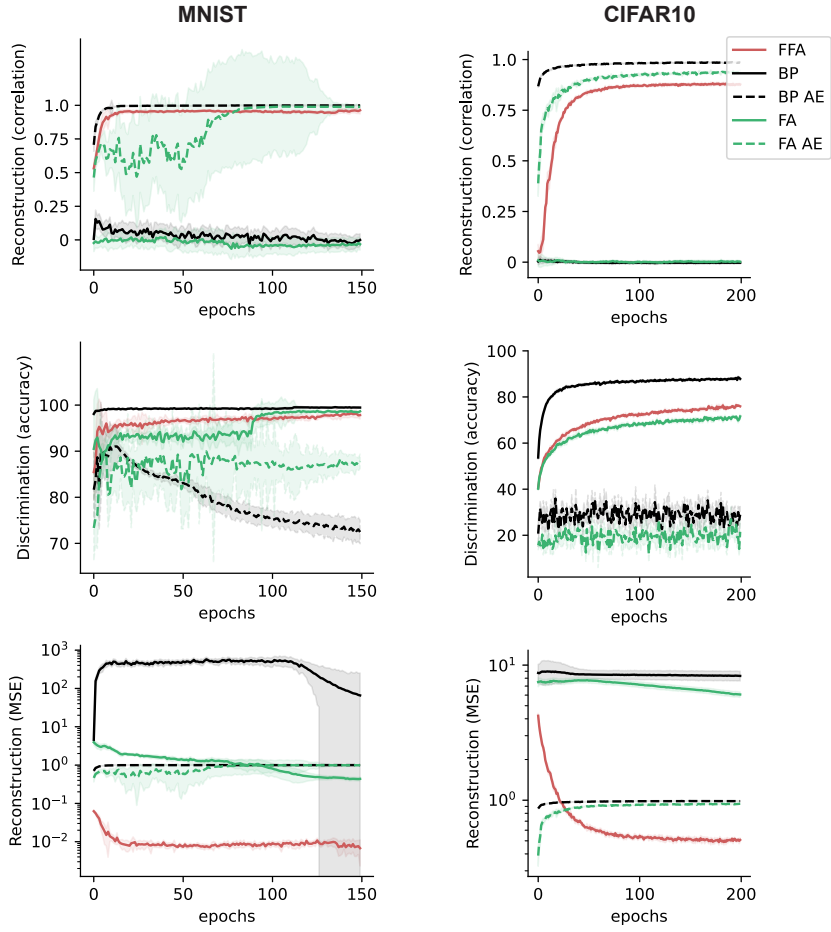

Figure 7: Co-optimization in FFA compared to single objective (either discrimination or reconstruction) control networks for MNIST and CIFAR10 (extensive version of Figure 2).

### 8.3 Robustness assessment

We added Gaussian noise with zero mean and varied the variance  $\sigma^2 = [0.0, 0.2, 0.4, 0.8, 1.0]$  to assess the robustness of models to input noise. We also performed a widely used white box adversarial attack Fast Gradient Sign Method (FGSM) (Goodfellow et al., 2015). FGSM can be summarized by

$$x' = x + \sigma \text{sign}(\Delta_x J(x, y^*))$$

where  $\sigma$  is the magnitude of the perturbation,  $J$  is the loss function and  $y^*$  is the label of  $x$ . While in BP this perturbation is computed through transposed forward parameters, for FFA and FA, we use their gradient pass parameters which are learned feedback and random feedback, respectively. We used a range of  $\epsilon$  to cover the interval between 0 to 1.

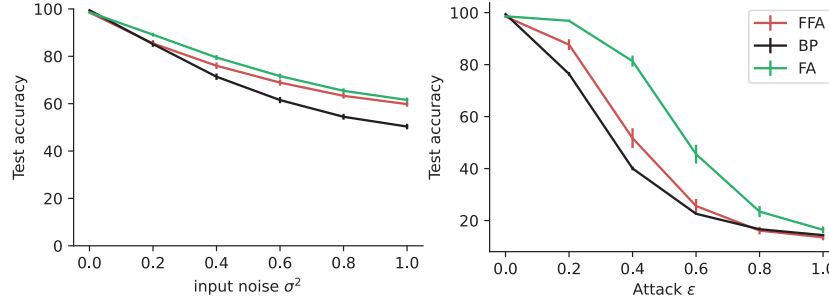

Figure 8: Robustness to Gaussian noise and adversarial attacks for MNIST. Robustness to noise and adversarial attacks in input (image) space for FFA and control algorithms. FA and FFA both exhibit more robustness than BP-trained discriminators.

### 8.4 Visual inference algorithm

We adapt the sampling algorithm developed in (Kadkhodaie and Simoncelli, 2021) to implement the visual inference in FFA-trained networks.  $\beta$  parameter which varies between 0 and 1 controls the proportion of injected noise ( $\beta = 1$  indicates no noise).

---

#### Algorithm 1 \*

---

parameters:  $\sigma_0, \sigma_L, h_0, \beta$

initialization:  $t = 1$ , draw  $x_0 \sim \mathcal{N}(0.5, \sigma_0^2 I)$

**while**  $\sigma_{t-1} \leq \sigma_L$  **do**

$$h_t = \frac{h_0 t}{1 + h_0(t-1)}$$

$$d_t = x_{t-1} - \hat{x}_{t-1}$$

$$\sigma_t^2 = \frac{\|d_t\|^2}{N}$$

$$\gamma_t^2 = ((1 - \beta h_t)^2 - (1 - h_t)^2) \sigma_t^2$$

Draw  $z_t \sim \mathcal{N}(0, I)$

$$x_t \leftarrow x_{t-1} + h_t d_t + \gamma_t z_t$$

$$t \leftarrow t + 1$$

**end**

Stochastic gradient ascent method for sampling from the implicit prior in a denoiser autoencoder as in Kadkhodaie and Simoncelli (2021)

---

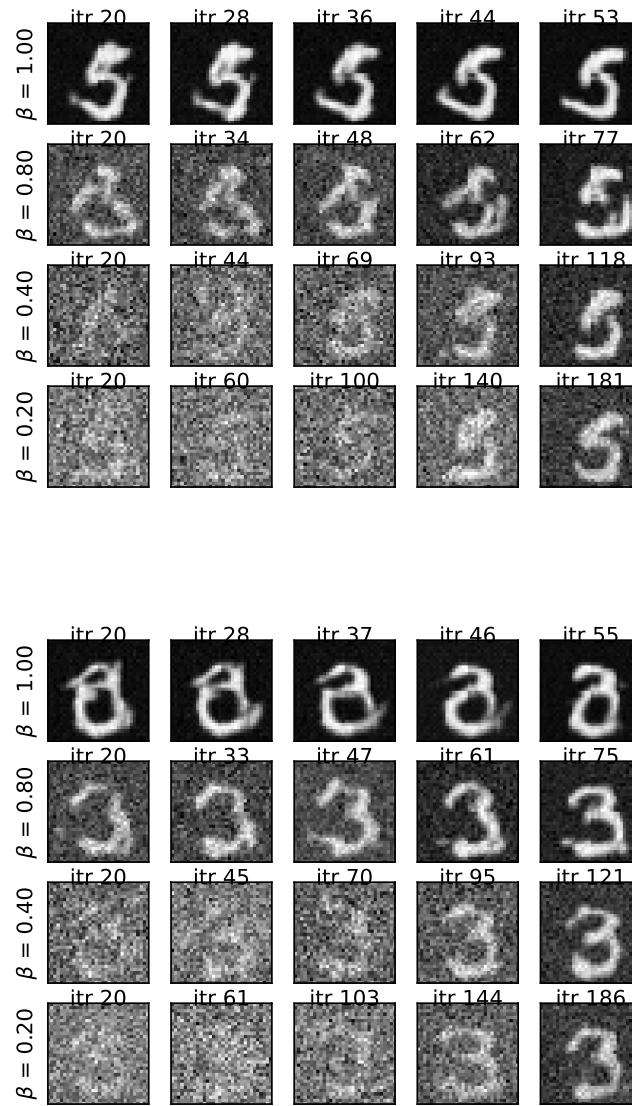

Figure 9: Sample visual imagery related to Figure 6 in the main text.

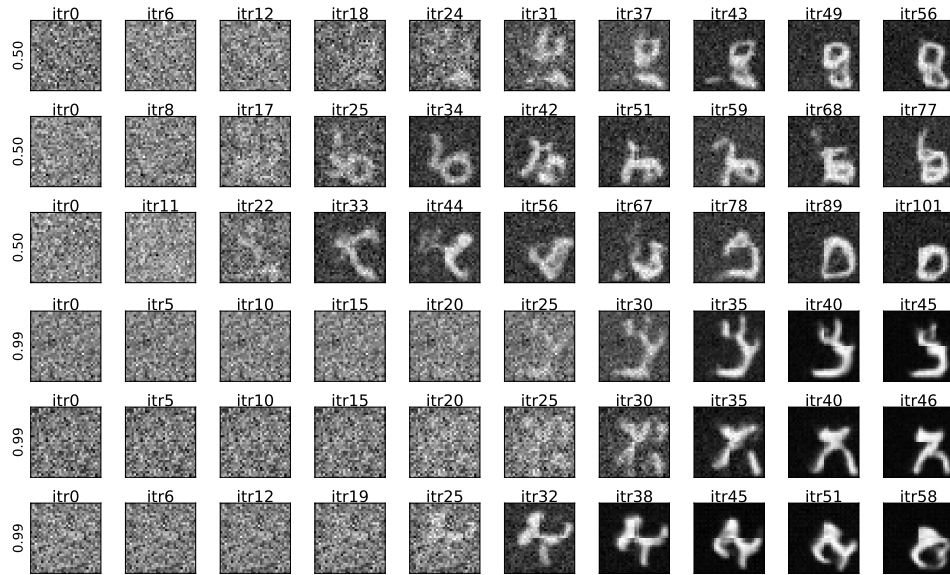

Figure 10: Sample hallucinations related to Figure 5 in the main text.
